1 **Frequent intergenotypic recombination between the non-structural and structural**  
2 **genes is a major driver of epidemiological fitness in caliciviruses**

3

4 Jackie E Mahar<sup>1,2</sup>, Maria Jenckel<sup>2</sup>, Nina Huang<sup>2</sup>, Elena Smertina<sup>2,4</sup>, Edward C Holmes<sup>1</sup>,  
5 Tanja Strive<sup>2,3</sup>, Robyn N Hall<sup>2,3\*</sup>

6 1. Marie Bashir Institute for Infectious Disease and Biosecurity, School of Life and  
7 Environmental Sciences and School of Medical Sciences, The University of Sydney,  
8 Sydney, NSW 2006, Australia.

9 2. Commonwealth Scientific and Industrial Research Organisation, Health and Biosecurity,  
10 Black Mountain, ACT 2601, Australia.

11 3. Centre for Invasive Species Solutions, University of Canberra, Bruce, ACT 2617,  
12 Australia.

13 4. Faculty of Science and Technology, University of Canberra, Bruce, ACT 2617, Australia.

14 \*Corresponding author: [robyn.hall@csiro.au](mailto:robyn.hall@csiro.au); +61 2 6246 4245

15

16 Total word count: 6910

17

18 Keywords: calicivirus, recombination, genomic epidemiology, lagovirus, RHDV2

19 **Abstract**

20 The diversity of lagoviruses (*Caliciviridae*) in Australia has increased considerably. By  
21 the end of 2017, five variants from three viral genotypes were present in populations of  
22 Australian rabbits, while prior to 2014 only two variants were known. To understand the  
23 interactions between these lagovirus variants we monitored their geographical  
24 distribution and relative incidence over time through a landscape-scale competition  
25 study, and from this, revealed potential drivers of epidemiological fitness. Within three  
26 years of the arrival of GI.1bP-GI.2 (RHDV2) into Australia, we observed the emergence  
27 of two novel recombinant lagovirus variants, GI.4eP-GI.2 (4e-recombinant) in New  
28 South Wales and GI.4cP-GI.2 (4c-recombinant) in Victoria. Although both novel  
29 recombinants contain the non-structural genes from benign, rabbit-specific, enterotropic  
30 viruses, these variants were recovered from the livers of both rabbits and hares that had  
31 died acutely. This suggests that determinants of host and tissue tropism for lagoviruses  
32 are associated with the structural genes, and that tropism is intricately connected with  
33 pathogenicity. Phylogenetic analyses demonstrated that the 4c-recombinant emerged  
34 independently on multiple occasions, with five distinct lineages observed. Both new  
35 recombinant variants replaced the previous dominant parental RHDV2 in their  
36 respective geographical areas, despite sharing an identical or near-identical (i.e., single  
37 amino acid change) major capsid protein with the parental virus. This suggests that  
38 epidemiological fitness of these recombinants was not driven by antigenic variation in  
39 the capsid, implicating the non-structural genes as key drivers of epidemiological  
40 fitness. Molecular clock estimates place the GI.4e recombination event in early to mid-  
41 2015, while the five GI.4c recombination events occurred from late 2015 through to  
42 early 2017. The emergence of at least six viable recombinant variants within a two-year  
43 period highlights an unprecedented frequency of these events, detectable only due to  
44 intensive surveillance, and demonstrates the importance of recombination in lagovirus  
45 evolution.

46

## 47 Introduction

48 Caliciviruses are an important group of vertebrate-infecting viruses. They include  
49 noroviruses, the major cause of gastroenteritis in humans worldwide [1], and members  
50 of the genus *Lagovirus*, which infect rabbits and hares. Some lagoviruses are  
51 hepatotropic and cause an acute fulminant viral hepatitis with a case fatality rate  
52 exceeding 90%, while others are enterotropic and are thought to be entirely benign [2].  
53 These are referred to as rabbit haemorrhagic disease viruses (RHDVs) and rabbit  
54 caliciviruses (RCVs), respectively.

55 Lagoviruses are hierarchically classified by their major capsid protein (VP60) type, and  
56 less frequently by polymerase type, into genogroups (e.g. GI, GII), genotypes (e.g. GI.1,  
57 GI.2, GI.4), and variants (e.g. GI.1a, GI.1b, GI.1c) [3]. The first lagoviruses identified,  
58 from hares in Europe in the early 1980s, were those of the GII.1 genotype (EBHSV) [4].  
59 Subsequently, mortality events in *Oryctolagus* rabbits in China in 1984 led to the  
60 discovery of genotype GI.1 (RHDV1) viruses [5]. With an increasing diversity of GI.1  
61 viruses, this genotype was further subdivided based on the VP60 phylogeny into several  
62 variants. In 1997, the first antigenic variants of GI.1 viruses, now classified as GI.1a  
63 (RHDVa), were described in Italy [6] and these spread throughout Europe and more  
64 distantly. Then, in 2010, the GI.2 (RHDV2) variant first emerged in France [7-9]. RHDV2  
65 rapidly spread globally, triggering epizootics worldwide in wild and domestic lagomorph  
66 populations. As surveillance efforts and technologies improved, non-pathogenic GI.3  
67 (RCV-E1) and GI.4 (RCV-A1, RCV-E2) lagoviruses were identified in the 1990s, first in  
68 Europe [10-13] and then in Australia [14] and New Zealand [15]. Non-pathogenic hare  
69 lagoviruses (GII.2, GII.3, GII.4, GII.5; HaCV) have also been reported more recently, in  
70 2014 in Europe [16-18] and 2019 in Australia [19].

71 Lagoviruses, like other caliciviruses, are small, non-enveloped viruses containing a  
72 monopartite positive-sense single-stranded RNA genome approximately 7.5 kb in length  
73 (Figure 1) [2]. Virus particles contain both genomic RNA (gRNA) and 3' co-terminal sub-  
74 genomic RNAs (sgRNA) approximately 2.5 kb in length [20]. In lagoviruses, the non-  
75 structural (NS) genes are situated upstream of the major capsid protein, VP60, all of  
76 which are encoded as a single large polyprotein (ORF1), while the 3' terminal ORF2

77 encodes a minor structural protein that is presumed to be important for genome release  
78 during infection [21]. Lagoviruses encode seven NS proteins, including a helicase (2C-  
79 like), a viral genome-linked protein (VpG), a protease (Pro), an RNA-dependent RNA  
80 polymerase (RdRp), and three proteins of unknown function (p16, p23, p29). Both  
81 gRNA and sgRNA are linked to VpG at their 5' end and are polyadenylated at their 3'  
82 end [22]. There is considerable homology between the 5' terminal nucleotide sequences  
83 of the gRNA and sgRNA (Figure 1) [22], facilitating recombination at the junction  
84 between the RdRp and VP60; this region is highly conserved within and between  
85 genogroups.

86

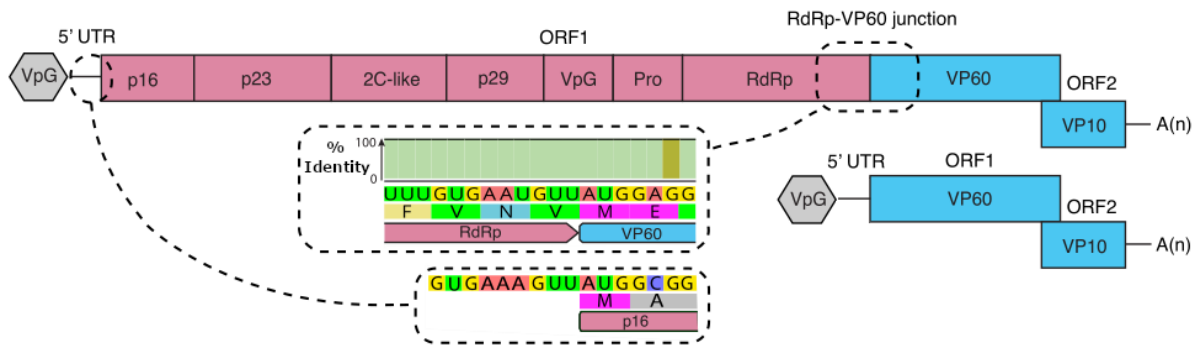

87

88 **Figure 1: Lagovirus genome organisation.** Genomic RNAs (gRNA) encode the non-  
89 structural proteins (pink) and structural proteins (blue), while subgenomic RNAs  
90 (sgRNA) encode the structural proteins only. Both RNAs are linked to VpG at their 5'  
91 end and are polyadenylated at their 3' end. Inset boxes demonstrate the nucleotide  
92 sequence identity between the 5' untranslated region (UTR) of the gRNA and the RdRp-  
93 VP60 junction. An identity plot (based on n = 478 near-complete GI sequences from  
94 GenBank; green indicates 100% identity) is also shown for the junction region.

95

96 Recombination is an important evolutionary mechanism in many RNA viruses [23]. In  
97 the *Caliciviridae*, recombination frequently occurs at the junction between the NS and  
98 structural genes, effectively mixing a set of structural genes with an entirely new set of  
99 NS genes [24-26]. Recombinant lagoviruses are defined by the nomenclature [RdRp

100 genotype]P-[capsid genotype], and can include combinations of two pathogenic RHDVs  
101 (e.g. GI.1bP-GI.2) as well as the seemingly more common combination of a benign  
102 RCV and a pathogenic RHDV (e.g. GI.4eP-GI.1a, GI.4eP-GI.2, GI.3P-GI.2) [24, 27-32].  
103 Retrospective phylogenetic analyses have demonstrated that all GI.2 viruses so far  
104 described are recombinants (GI.3P-GI.2), implying that GI.2 is an orphan capsid-type  
105 [24]. Intergenogroup recombinants between GI (rabbit and hare) and GII (hare) viruses  
106 have also been reported, with two GII.1P-GI.2 viruses recovered from hares in Germany  
107 in 2014 and 2019 [33].

108 Prior to 2016, three lagovirus genotypes (GI.1, GI.2, GI.4) from the G.I genogroup,  
109 comprising five distinct variants — GI.4 (RCV-A1), GI.1c (RHDV1), GI.1a (RHDVa-K5),  
110 GI.4eP-GI.1a (RHDVa-Aus), GI.1bP-GI.2 (RHDV2) — had been reported in Australia.  
111 These variants differ in their host and tissue tropism and in pathogenicity [34]. RCV-A1  
112 is a benign enterotropic virus that has circulated in wild and domestic rabbits, likely  
113 since at least the 1950s [14, 35]. RHDV1 and RHDVa-K5 are pathogenic viruses, both  
114 deliberately released [36]. RHDVa-Aus and RHDV2 were both exotic incursions, first  
115 detected in January 2014 and May 2015, respectively [32, 37]. Phylogenetic analyses  
116 suggest that both incursions arose from single point source introductions with  
117 subsequent ongoing transmission in Australian rabbit populations [32, 34]. In mid-2017  
118 a novel GI.4eP-GI.2 recombinant virus (4e-recombinant) was detected, comprising the  
119 NS sequences of the RHDVa-Aus virus and RHDV2 VP60 sequences [31]. However,  
120 the long-term epidemiological significance of this recombinant variant was unclear.

121 Australia is an ideal setting for understanding the evolution, recombination, and  
122 epidemiological interactions of caliciviruses. Australia is an isolated landmass with a  
123 large rabbit population that is distributed across most of the country. The genetic  
124 diversity of Australian lagoviruses arose from a small number of introduction (or  
125 incursion) events, and the parental sequence as well as the timing of the introduction is  
126 known in several instances. Since there is little movement of rabbits into the country,  
127 the study of lagoviruses can occur in a relatively controlled environment with a defined  
128 number of pre-existing pathogenic viruses. Additionally, a robust surveillance system for  
129 these viruses has been in place since 2014. The previous lack of diversity of the

130 Australian lagovirus population and sudden diversification of lagovirus variants in  
131 2014/2015 created the perfect natural experimental conditions for monitoring the  
132 frequency of successful recombination and drivers of viral evolution. In this study we  
133 monitored the epidemiological and evolutionary dynamics of existing lagovirus variants  
134 in Australia, while determining the frequency and importance of successful  
135 recombination events between these viruses.

136

## 137 **Materials and Methods**

### 138 *Sample submission*

139 Samples from dead domestic and wild lagomorphs (i.e., rabbits and hares) were  
140 submitted either directly or via RabbitScan (<https://www.feralscan.org.au/rabbitscan/>) to  
141 the Commonwealth Scientific and Industrial Research Organisation (CSIRO) by  
142 veterinarians, pet owners, landholders, and members of the public as part of ongoing  
143 opportunistic lagovirus surveillance. No animal ethics approvals are required for  
144 sampling rabbits that are found dead in Australia. Samples were provided either fresh-  
145 frozen or stored in an RNA stabilization solution [31]. Additionally, 42 positive samples  
146 submitted to the Elizabeth Macarthur Agricultural Institute (EMAI) for RHDV diagnostic  
147 testing were forwarded to CSIRO, either as fresh-frozen tissue or as a swab of the cut  
148 tissue stored in phosphate buffered gelatin saline (PBGS) [38]. Samples for this study  
149 were restricted to those collected between 1 January 2014 (based on the estimated  
150 time of incursion of GI.1bP-GI.2 into Australia [34, 39]) and 30 September 2020, and  
151 were received from the Australian Capital Territory (ACT, n = 139), New South Wales  
152 (NSW, n = 401), the Northern Territory (NT, n = 7), Queensland (QLD, n = 86), South  
153 Australia (SA, n = 227), Tasmania (TAS, n = 221), Victoria (VIC, n = 649), and Western  
154 Australia (WA, n = 194) (total n = 1,924).

### 155 *Initial testing*

156 RNA was extracted from 20 – 30 mg of tissue, predominantly liver or bone marrow, but  
157 occasionally spleen, kidney, muscle, ear tip, eyelid, or blowfly maggots retrieved from  
158 the carcass. After homogenisation with glass beads using a Precellys 24-dual tissue

159 homogenizer (Bertin Technologies), RNA was extracted using either the Maxwell 16  
160 LEV simplyRNA tissue kit (Promega, Alexandria, NSW) or RNeasy mini kit (Qiagen,  
161 Chadstone Centre, VIC) as per manufacturers' directions. For swab samples, RNA was  
162 extracted from 200 µl PBGS using the Purelink viral RNA/DNA mini kit (ThermoFisher  
163 Scientific). Samples were screened for known lagoviruses using a broadly-reactive  
164 lagovirus SYBR-green based RT-qPCR targeting VP60 and sgRNA, as described  
165 previously [31].

### 166 *Variant identification*

167 Of the samples that were positive by screening RT-qPCR (n = 1,209), 175 were  
168 sequenced previously for other studies [31, 32, 34, 37, 40]. The remaining samples  
169 were screened for recombination by RT-PCR and sequencing. RT-PCR primers were  
170 designed that spanned the RdRp-VP60 junction, generating a 555 bp amplicon (Rec2  
171 RT-PCR; Supplementary table 1). Primers were subsequently modified by the 5'  
172 addition of Illumina pre-adapter and index primer binding sequences to enable high-  
173 throughput Illumina sequencing (Rec2.tailed RT-PCR; Supplementary table 1). Assays  
174 were experimentally validated to confirm reactivity with all known Australian lagoviruses.  
175 For a subset of samples (prior to the development of the Rec2 RT-PCR), amplification  
176 over the RdRp-VP60 junction was performed with alternative primer sets  
177 (Supplementary table 1). Briefly, each 25 µl PCR reaction comprised 1x OneStep  
178 Ahead RT-PCR master mix (Qiagen), 1x OneStep Ahead RT mix (Qiagen), 0.5 µM each  
179 primer, and 1 µl of extracted RNA diluted 1/10 in nuclease-free water. Cycling  
180 conditions were: 45 °C for 15 min, 95 °C for 5 min, followed by 40 cycles of 95 °C for 15  
181 sec, 55 °C for 15s, 68 °C for 2 min, with a final extension of 68 °C for 5 min.

182 Amplicons were purified and either sent for Sanger sequencing at the Biomolecular  
183 Resource Facility, The John Curtin School of Medical Research, Australian National  
184 University, or were indexed, pooled, and sequenced on an Illumina MiSeq (300-cycle v2  
185 chemistry) according to the manufacturer's directions. After quality trimming, sequences  
186 were partitioned into regions upstream and downstream of the RdRp-VP60 junction.  
187 Each partition was aligned with representative sequences of known Australian lagovirus  
188 variants using MAFFT v7.450 [41] in Geneious Prime 2020.0.4, and an RdRp and VP60

189 variant type was assigned for each sample. Four isolates were identified as mixed  
190 infections based on sequencing. Alignments of partial sequences are available at  
191 <https://doi.org/10.25919/758f-4t15>.

### 192 *Molecular epidemiological analyses*

193 To investigate the geographical distribution and relative incidences of recombinant  
194 variants over time, positive samples were restricted to those reported after 1 January  
195 2016; i.e., 6 months prior to the first detection of a novel recombinant (n = 1,139).  
196 Samples identified as RHDVa-K5 (n = 121) were excluded from further analyses since  
197 these were mostly associated with release sites of this approved biocontrol virus; that is,  
198 this variant was not transmitting through rabbit populations and was therefore not  
199 competing epidemiologically with other virus variants [39]. Samples from the ACT were  
200 grouped with those from NSW, since the ACT is a small jurisdiction (2,358 km<sup>2</sup>) located  
201 within NSW and was considered epidemiologically to be part of NSW.

202 For the 4c-recombinant lineage designation, 169 4c-recombinant sequences spanning  
203 the RdRp-VP60 junction were aligned with 77 4c-recombinant full genomes and 26  
204 publicly available GI.4 genomes using MAFFT v7.450 [41]. The taxa included in the final  
205 data set are detailed in Supplementary table 2. The alignment was trimmed to  
206 nucleotide positions 5,115 – 5,619, based on the M67473.1 DEU/FRG/1988.50  
207 reference sequence (<https://www.ncbi.nlm.nih.gov/genbank/>). The remaining 109 4c-  
208 recombinant sequences obtained in this study were not suitable for inclusion in the final  
209 alignment because they were generated either using Illumina sequencing or an  
210 alternative primer set and thus did not span the complete region of the alignment. Model  
211 selection and maximum likelihood (ML) tree inference was conducted using IQ-  
212 TREE v1.6.11 [42], and branch supported was estimated by 1,000 replicates of the SH-  
213 like approximate likelihood ratio test [43]. The tree was rooted on the internal branch  
214 leading to the RCV-A1 lineage.

### 215 *Full genome sequencing*

216 Of the 1,034 samples genotyped to the variant level, a subset of 224 were selected for  
217 full genome sequencing (Supplementary table 3). These samples were selected to be



218 geographically and temporally representative, with a focus on the novel 4e- and 4c-  
219 recombinants. Viral genomes were amplified in overlapping fragments, and DNA  
220 libraries were prepared and sequenced using Illumina Miseq technology as described  
221 previously [35, 40]. Primers used for amplification of the overlapping fragments are  
222 detailed in Supplementary table 1. Consensus sequences were constructed by mapping  
223 cleaned reads to the lagovirus GI reference sequence (GenBank accession M67473.1  
224 DEU/FRG/1988.50) using Geneious Prime 2020.0.4. Sequences were deposited in  
225 GenBank under accession numbers MW460205 – MW460242.

### 226 *Recombination analysis*

227 To further characterise the putative novel 4c-recombinant variant, and the newly  
228 sequenced GI.4e-recombinants, recombination analyses were conducted on full  
229 genome sequences using the RDP4 software [44]. The complete genome alignment  
230 included lagovirus GI potential parent sequences from GenBank  
231 (<https://www.ncbi.nlm.nih.gov/genbank>) (n = 384, 7,309 nt, Supplementary table 4).  
232 Recombination was reported if detected by at least two of three primary scanning  
233 methods (RDP, MaxChi and GENECONV), with a highest acceptable p-value of 0.05  
234 with Bonferroni multiple comparison correction. The BootScan, 3Seq, CHIMAERA, and  
235 SciScan methods were used to verify recombination events identified using the primary  
236 methods.

### 237 *Phylogenetic analyses*

238 Newly sequenced lagovirus genomes were aligned with representative GI lagovirus  
239 sequences from GenBank (<https://www.ncbi.nlm.nih.gov/genbank>) using MAFFT v7.271  
240 [41]. The complete genome alignment was split into two data sets representing (i) the  
241 NS genes (n = 240 sequences, 5,231 nt, Supplementary table 5), and (ii) the VP60  
242 structural gene (n = 272, 1,740 nt, Supplementary table 6). An additional VP60  
243 alignment was constructed that contained the VP60 of the newly sequenced viruses  
244 along with all published Australian RHDV2 VP60 sequences (n = 332, 1,737 nt,  
245 Supplementary table 7). Model selection and ML tree estimation was performed using  
246 IQ-TREE v1.6.11 [42], as described above. Ancestral state reconstruction to identify  
247 nonsynonymous changes along individual branches was carried out using PAML v4.9 [45].

248 *Phylogeographic analyses*

249 A Bayesian Markov chain Monte Carlo (MCMC) approach was employed to infer time-  
250 scaled phylogenies, and from this, to infer the temporal pattern and most likely  
251 geographic location of internal nodes (i.e., phylogeography). All data sets were initially  
252 screened using TempEst [46] to ensure that sufficient temporal signal was present,  
253 using ML phylogenies as input to construct linear regressions of root-to-tip genetic  
254 distances against sampling time. Due to recombination between the NS and capsid  
255 genes, two data sets either side of the recombination breakpoint were analysed  
256 separately: (i) a VP60 gene data set containing all published Australian GI.2 capsid  
257 sequences together with the capsid genes of the recombinants sequenced here ( $n =$   
258 332, 1,737 nt, Supplementary table 7); and (ii) an NS genes data set of all published  
259 Australian GI.4 sequences together with the NS genes of the recombinants sequenced  
260 here ( $n = 188$ , 5,218 nt, Supplementary table 8). The Bayesian Evolutionary Analysis by  
261 Sampling Trees (BEAST) software v1.8 [47] was used to conduct Bayesian MCMC  
262 analysis of each data set, using substitution models inferred using ModelFinder as  
263 implemented in IQ-TREEv1.6.11 [42] (VP60, SYM+G4; NS, SYM+I+G4) [48]. A discrete  
264 traits partition indicating the sampling location (Australian state) was included to  
265 facilitate ancestral state reconstruction of location (utilizing the symmetric substitution  
266 model, inferring social network with Bayesian Stochastic Search Variable Selection, and  
267 a strict clock model). All analyses were run twice to convergence (defined as an  
268 effective sample size  $>200$ ) to confirm consistency. Marginal likelihood estimation using  
269 path sampling/stepping-stone sampling was used to assess the most appropriate clock  
270 model prior (strict vs uncorrelated log-normally distributed [UCLD]) and tree prior  
271 (Gaussian Markov random field Bayesian skyride model vs constant size coalescent vs  
272 exponential coalescent) for the nucleotide partition.

273 The NS data set had a better temporal signal (R-squared of 0.86 on linear regression of  
274 root-to-tip genetic distance against sampling time) and a larger sampling window  
275 compared to the VP60 data set and was therefore considered the most informative. The  
276 UCLD clock model and constant population size coalescent tree prior had the highest  
277 marginal likelihood for this data set.

## 278 *Figures*

279 Figures were constructed using R v4.0.3 [49] using the following packages: 'ggtree  
280 v2.2.1' [50], 'treeio v1.12.0' [51], 'scales v1.1.1' [52], 'tidyverse v1.3.0' [53], 'ape v5.4'  
281 [54], 'phytools v0.7-47' [55], 'phangorn v2.5.5' [56], 'cowplot v1.0.0.9000' [57], 'lubridate  
282 v1.7.8' [58], 'plyr v1.8.6' [59], and 'ozmaps v0.3.6' [60]. Figure 3B was generated in  
283 GeneiousPrime 2020.2.4 using 3-D structure viewer.

284

## 285 **Results**

### 286 *Phylogenetic analyses reveal five independent recombination events in GI.4cP-GI.2* 287 *viruses*

288 A recombinant lagovirus variant (GI.4eP-GI.2; 4e-recombinant) was previously detected  
289 in Australia using a multiplex RT-PCR assay. This assay is only able to detect specific  
290 recombinant variants [31]. Therefore, to comprehensively screen for lagovirus  
291 recombination events we sequenced the RdRp-VP60 junction region (i.e., the typical  
292 recombination breakpoint) of 1,034 lagoviruses collected between January 2014 and  
293 September 2020 (inclusive) from wild and domestic lagomorphs found dead across  
294 Australia. This screen identified six distinct lagovirus variants circulating in Australia  
295 during the study period: four known variants (GI.1cP-GI.1c (RHDV1), GI.1bP-GI.2  
296 (RHDV2), GI.1aP-GI.1a (RHDVa-K5), GI.4eP-GI.1a (RHDVa-Aus)), the previously  
297 reported 4e-recombinant (GI.4eP-GI.2), and a novel GI.4cP-GI.2 putative recombinant  
298 (4c-recombinant).

299 We selected a subset of novel 4c-recombinant viruses, recently emerged 4e-  
300 recombinant viruses, and parental RHDV2 viruses for full genome sequencing, selecting  
301 isolates that were representative of the temporal and geographical spread of these  
302 variants. Recombination analyses of newly sequenced 4e-recombinant viruses  
303 confirmed these as recombinants with a breakpoint at the RdRp-VP60 junction,  
304 supporting our previous finding (Table 1, Supplementary table 4). Recombination  
305 analyses of the novel putative 4c-recombinant viruses also detected a recombination  
306 breakpoint at the typical RdRp-VP60 junction (Table 1). The most likely parental

307 variants for the 4c-recombinant, as determined by the RDP4 software, were benign  
308 Australian GI.4 (RCV-A1) lagoviruses in the NS region (GenBank accession KX357699)  
309 and Australian GI.2 (RHDV2) viruses in the VP60 region (GenBank accession  
310 MF421577), strongly suggesting that this recombination event occurred within Australia  
311 after the arrival of GI.2 in late 2014.

312 Subsequently, the nucleotide alignment was partitioned either side of the putative  
313 breakpoint and ML phylogenetic trees were inferred for the NS genes and the VP60  
314 gene separately. There was clear incongruence between the NS and VP60  
315 phylogenies, supporting the results of the RDP4 analysis (Figure 2). Strikingly, ML  
316 phylogenies based on the VP60 region revealed five distinct lineages of the 4c-  
317 recombinant variant, suggesting multiple independent emergences of this variant  
318 (Figure 3A). In contrast, the NS gene sequences from this variant formed a  
319 monophyletic group (collapsed in Figure 2A). All 4e-recombinant sequences fell within a  
320 single clade in both trees (Figure 2).

321

322

323 **Table 1. Recombination analyses**

| Recombinant details                         |                      | Putative parent <sup>^</sup> |                          | P-value for recombination event by detection method |        |           |
|---------------------------------------------|----------------------|------------------------------|--------------------------|-----------------------------------------------------|--------|-----------|
| Representative Recombinant Sequence         | Breakpoint Position* | NS Parent                    | S parent                 | RDP                                                 | Maxchi | GENE-CONV |
| GI.4eP-GI.2/O.cun*/AUS/NSW/2017-03-17/CAR-8 | 5306                 | KY628315/<br>GI.4eP-GI.1a    | MF421585/<br>GI.1bP-GI.2 | 4E-194                                              | 3E-43  | 3E-189    |
| GI.4cP-GI.2/O.cun/AUS/VIC/2017-02-05/ALV-1  | 5307                 | KX357699/<br>GI.4c           | MF421577/<br>GI.1bP-GI.2 | 3E-148                                              | 2E-39  | 1E-154    |

324 A more detailed version of this table can be supplied as Supplementary table 4.

325 \*Nucleotide position of putative breakpoint according to M67473.1/DEU/FRG/1988.50 reference sequence  
326 numbering.

327 <sup>^</sup>NS refers to putative parent providing the non-structural genes; S refers to putative parent providing the structural  
328 genes.

329

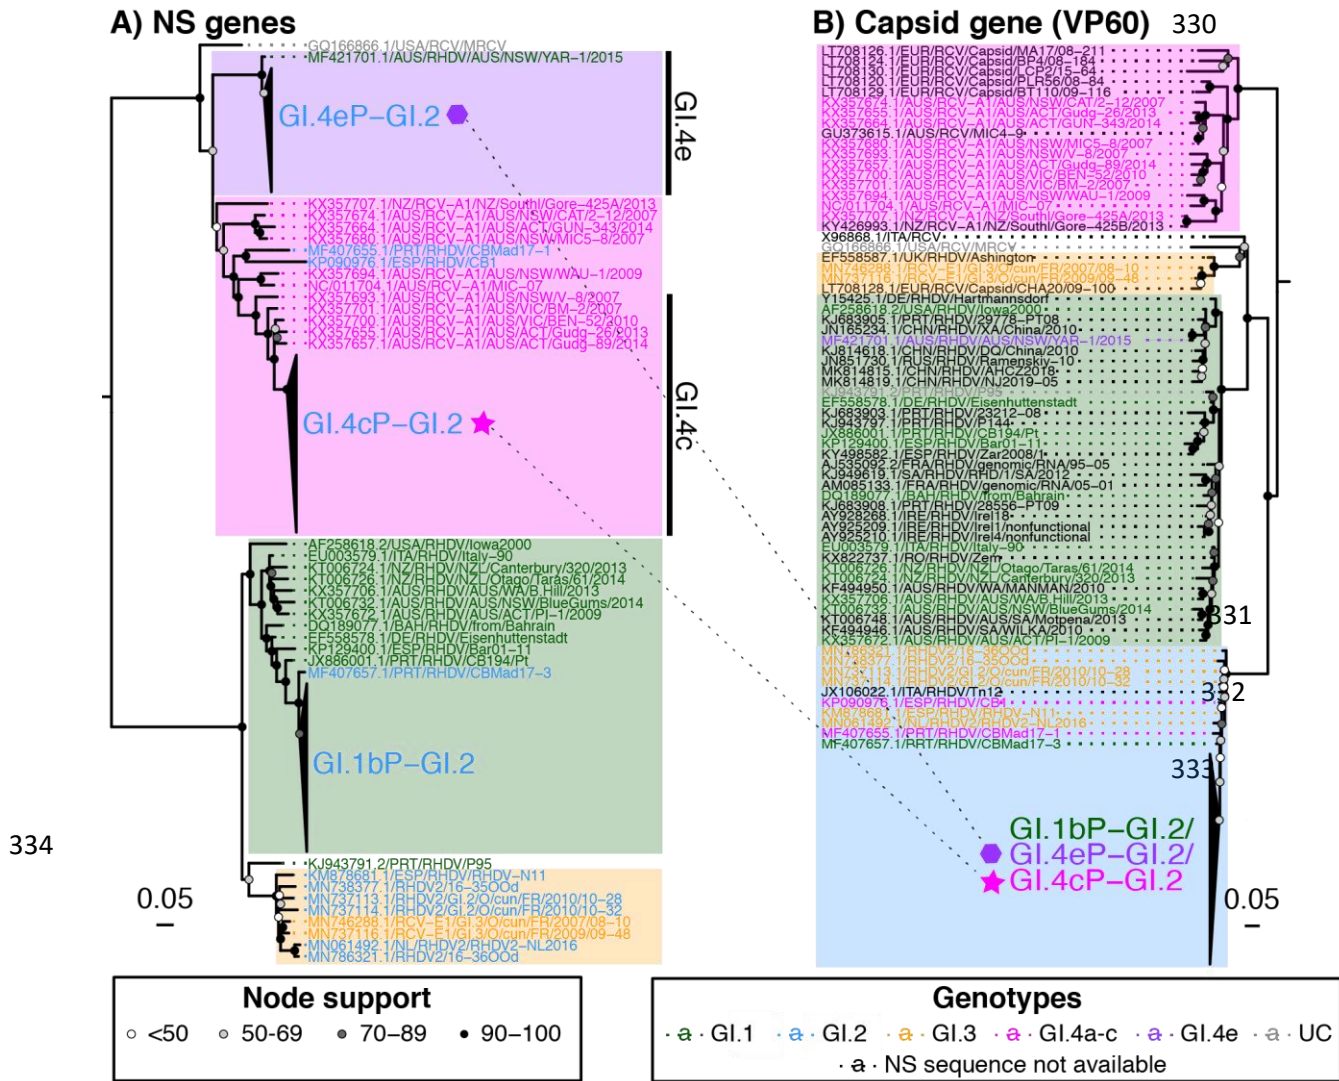

335 **Figure 2. ML phylogenetic trees of the (A) NS genes and (B) the VP60 gene of**  
 336 **representative lagovirus sequences and the Australian recombinant sequences.**  
 337 Discrepancies between the highlight and text colour indicate recombinant sequences.  
 338 Clades are highlighted according to the genotype of the genetic segment analysed in  
 339 the tree, while taxa names are coloured by the genotype of the alternative segment (i.e.,  
 340 taxa names in the NS gene tree are coloured by the genotype of the capsid gene, and  
 341 vice versa). Taxa names coloured black indicate that the NS sequence data is  
 342 unavailable. UC, unclassified. Major clades have been collapsed for visualization  
 343 purposes. All Australian recombinant sequences from this study fall within the collapsed  
 344 clades indicated by the star (GI.4cP-GI.2) or hexagon (GI.4eP-GI.2) symbols. The  
 345 dotted lines between the two trees link the Australian recombinant clades. Phylogenies

346 were midpoint rooted and the scale bars represent the number of substitutions per site.  
347 Bootstrap support values (1,000 replicates) are indicated by shaded circles at the  
348 nodes.

349

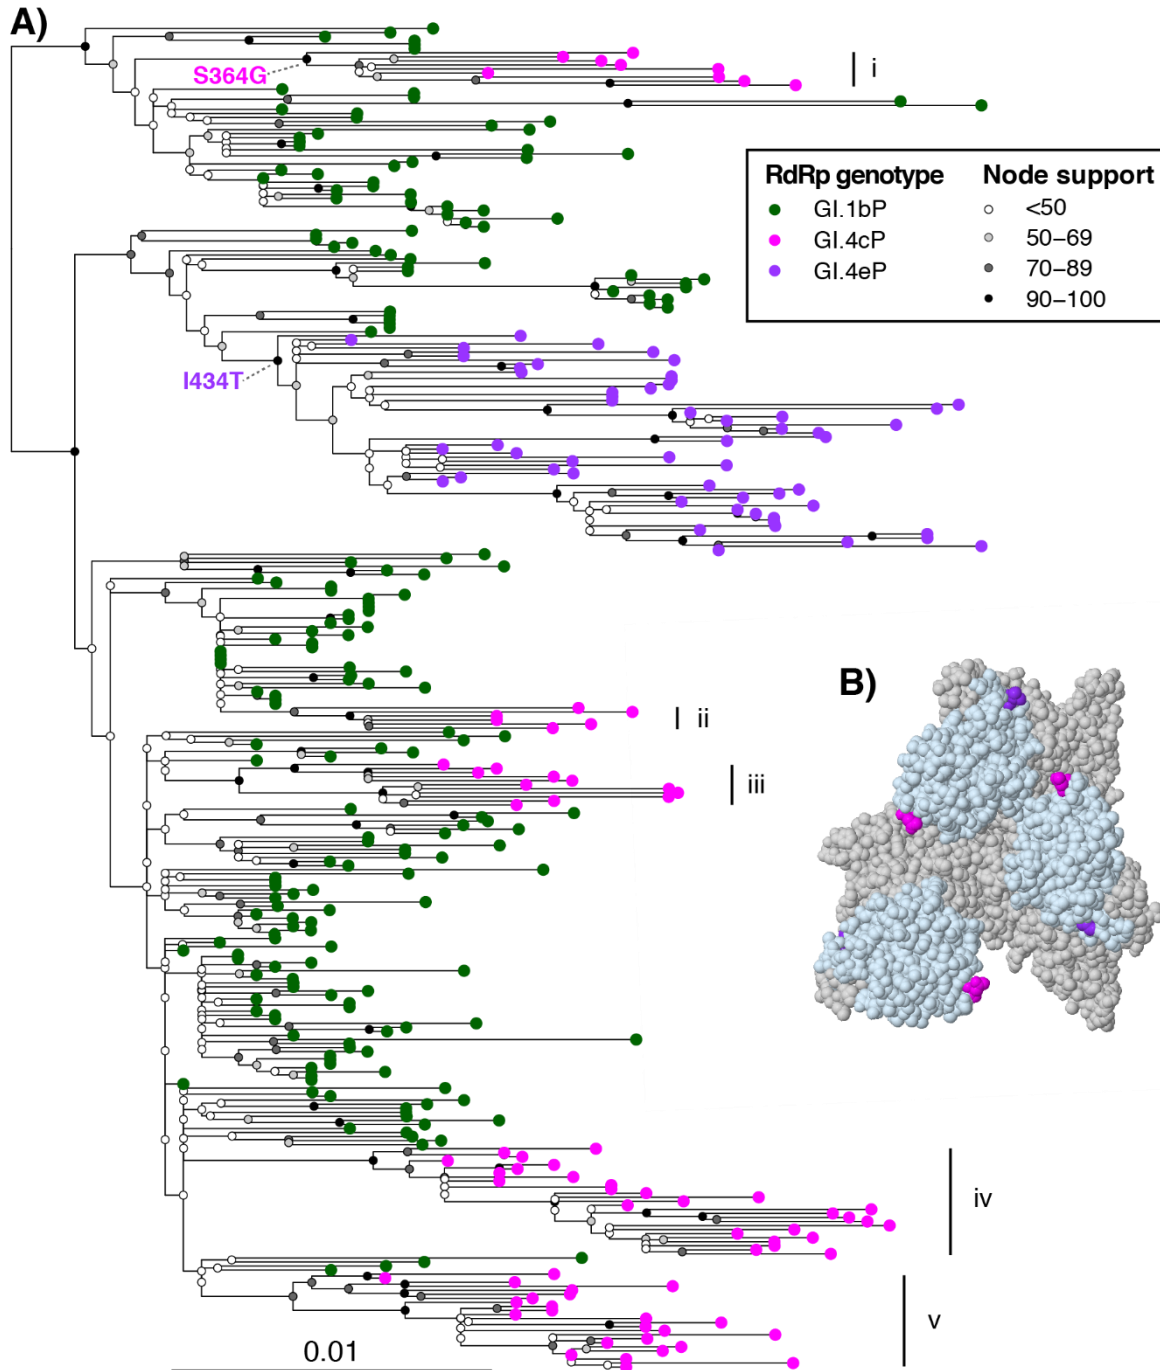

350

351 **Figure 3: ML phylogenetic tree of Australian GI.2 VP60 sequences and amino acid**  
352 **changes associated with the emergence of 4c- and 4e-recombinant variants.** (A) A  
353 phylogeny was inferred from the VP60 gene sequences (n = 332) of newly sequenced  
354 Australian GI.2 lagoviruses (including recombinants) along with representative  
355 published sequences. Coloured tip points represent the polymerase (RdRp) genotype:  
356 GI.1bP, green; GI.4cP, pink; GI.4eP, purple. GI.4cP lineages are labelled (i through v).  
357 The phylogeny was midpoint rooted and the scale bar represents nucleotide  
358 substitutions per site. Non-parametric bootstrap support values (1,000 replicates) are  
359 indicated by shaded circles at the nodes. Associated metadata including taxon names  
360 are provided in Supplementary table 7. Ancestral state reconstruction to identify  
361 nonsynonymous changes associated with internal divergence events was conducted  
362 using PAML. All changes occurring on branches leading to the GI.4cP and GI.4eP  
363 lineages are labelled at the relevant node. (B) These changes were mapped to an  
364 asymmetric unit of the atomic model of lagovirus GI VP60 (PDB accession: 3J1P). The  
365 P2 domain is coloured in light blue. Amino acid 364, associated with the change in 4c-  
366 recombinant lineage i, is coloured pink and 434, associated with the 4e-recombinant, is  
367 coloured purple.

368

369 *Rapid epidemiological replacement of parental RHDV2 by the newly emerged 4c- and*  
370 *4e-recombinants*

371 Detections of the new 4c-recombinant variant consistently outnumbered those of the  
372 parental RHDV2 in VIC by April 2018, 14 months after the first detection in Alvie, VIC,  
373 on 5 February 2017, suggesting that this variant was outcompeting previously  
374 circulating viruses (Figure 4). This pattern of emergence and replacement was also  
375 observed in TAS (Figure 4). This variant was detected sporadically in NSW/ACT from  
376 October 2017 where it cocirculated with the locally dominant 4e-recombinant; notably,  
377 the proportional incidence of the 4c-recombinant variant has increased in this region  
378 during 2020. Interestingly, a single detection of the 4c-recombinant was identified in WA  
379 in November 2018 in two domestic rabbits recently imported from TAS as breeding  
380 stock. The sequence of this 4c-recombinant virus detected in WA clearly nested within



381 the genetic diversity found in TAS (see Figure 4A, clade v), suggesting a single  
382 incursion into WA with no ongoing local transmission. During the study period, the novel  
383 4c-recombinant was recovered from several juvenile animals less than 800 g  
384 bodyweight and as young as 4 weeks old, demonstrating pathogenicity in young rabbits,  
385 like all other GI.2 variants characterized so far. It was also identified in one European  
386 brown hare (*Lepus europaeus*).

387 We also examined the distribution of the previously reported 4e-recombinant variant  
388 [31]. Most detections (n = 140) were identified in NSW/ACT. The earliest detection was  
389 in Tubbul, NSW, on 13 July 2016, and by March 2017 it had mostly replaced the  
390 parental RHDV2 to become the dominant lagovirus variant in this region (Figure 4B).  
391 More recently, in late 2019 and throughout 2020, it has cocirculated with the 4c-  
392 recombinant in NSW/ACT. Although most detections were in adult rabbits, the 4e-  
393 recombinant was also recovered from three European brown hares and from several  
394 juvenile rabbits down to 250 g bodyweight, suggesting a similar host tropism to the  
395 parental RHDV2 virus and the novel 4c-recombinant.

396

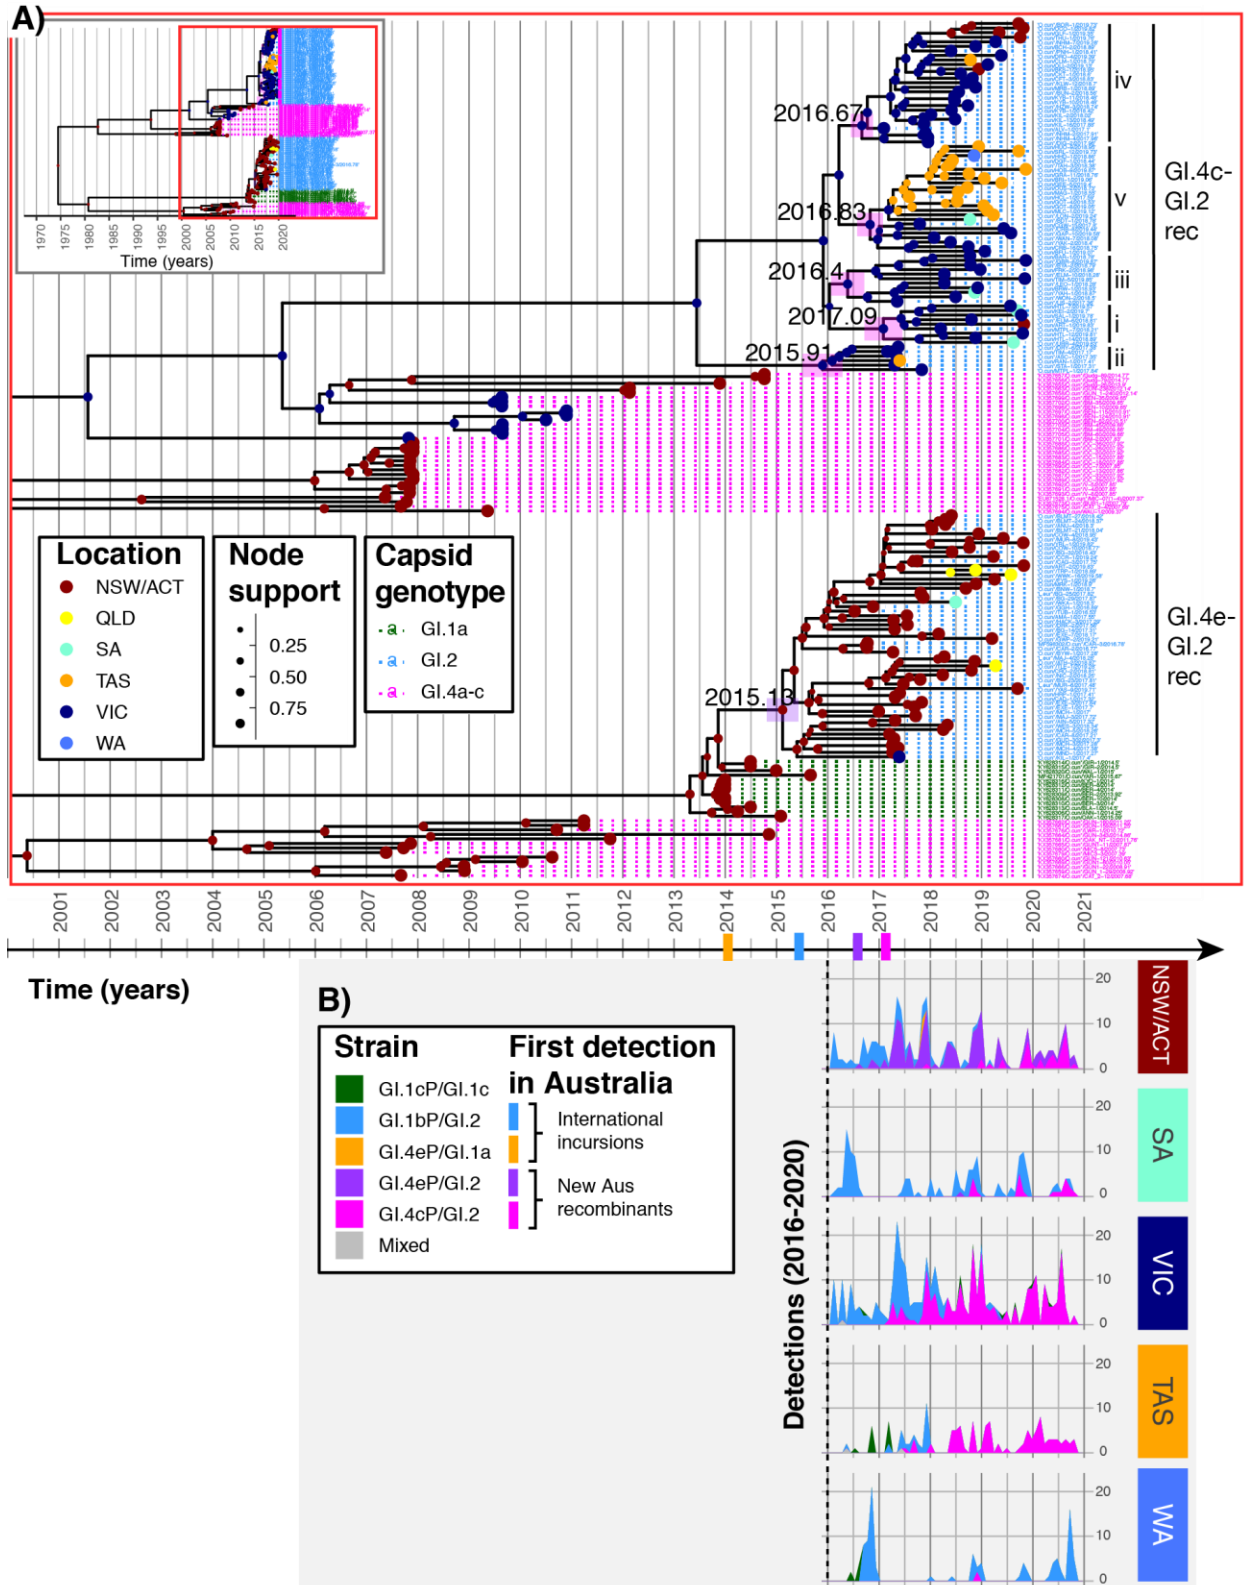

397 **Figure 4: Timing and location of the emergence of Australian lagovirus**  
 398 **recombinants based on time-structured phylogeographic reconstruction and RT-**

399 **qPCR detections.** Panels A and B are scaled to the same x-axis (shown between the  
400 two panels), given as time in years. (A) Time-structured phylogeographic analysis of  
401 Australian GI.4 lagovirus NS genes (uncorrelated log-normally distributed clock model,  
402 constant tree prior). The inset indicates the section of the phylogeny shown. Node and  
403 tip points are coloured according to location (Australian state) and node points are sized  
404 according to posterior support for that clade. Taxon names are coloured by capsid  
405 variant. The mean time to most recent common ancestor for the GI.4eP-GI.2 and each  
406 GI.4cP-GI.2 recombinant lineage is indicated at the respective internal node, and  
407 horizontal bars at these nodes represent the 95% highest posterior density (HPD). The  
408 recombinant (rec) clades are labelled, including the GI.4cP-GI.2 lineages (i – v). (B)  
409 Lagovirus positive samples collected in NSW/ACT, SA, VIC, TAS, and WA from 2016 to  
410 2020 (n = 739) were genotyped to the variant level by sequencing either side of the  
411 typical calicivirus recombination breakpoint. The number of detections of each variant  
412 by month are shown for each geographical region as an area plot, with the plotted area  
413 coloured by variant.

414

415 *All recombination events occurred within a two-year timeframe in eastern Australia*

416 To determine the temporal dynamics, the location of emergence, and the rate of viable  
417 recombination events in Australian lagoviruses, we conducted time-structured  
418 phylogenetic analyses for the NS and capsid genes of recombinant viruses and related  
419 sequences (i.e., Australian GI.2 VP60 and GI.4 NS sequences). Based on regression  
420 analysis, data from the GI.4 NS dataset was considered more accurate and is therefore  
421 presented in Figure 4. Based on these analyses, the 4e-recombinant was the first  
422 variant to emerge, with the most recent common ancestor of this lineage dated to early  
423 to mid-2015 (95% highest posterior density [HPD] NS dataset, 2014.8 – 2015.43)  
424 (Figure 4A). For the 4c-recombinants, the 95% HPD intervals of the time to most recent  
425 common ancestor (TMRCA) overlapped between lineages, making it difficult to  
426 confidently define the exact timings and order of emergence of each lineage (Figure  
427 4A). However, the data clearly show that these five recombination events all occurred  
428 within the space of two years. This two-year timeframe was consistently observed

429 regardless of whether the analysis was conducted on the NS genes GI.4 data set or the  
430 VP60 gene GI.2 data set. Our phylogeographic analysis (Figure 4A) suggests that all  
431 the 4c-recombinant lineages emerged in VIC (probability >0.99 for all lineages), with  
432 subsequent spread to other states. Notably, this was observed even for lineage v, which  
433 was first detected in Tasmania. In contrast, the 4e-recombinant clearly emerged in  
434 NSW/ACT (probability >0.99, Figure 4A); this is further supported by our  
435 epidemiological data, where we found only limited detections of this variant in other  
436 states (QLD, VIC, SA).

#### 437 *Continued cocirculation of 4c-recombinant lineages*

438 The 4c-recombinant viruses were initially assigned to lineages based on the GI.2 VP60  
439 phylogeny (Figure 3A). For GI.4c-recombinant viruses where a full genome sequence  
440 was not available, we first inferred a phylogeny from a 504 nt region spanning the  
441 RdRp-VP60 junction (Figure 5); this phylogeny was annotated using taxa for which the  
442 lineage was definitively known from the VP60 phylogeny. While sequences from each  
443 4c lineage (as defined from the complete genome sequences) did not form clades with  
444 individual common ancestors in the RdRp-VP60 junction phylogeny, they did form  
445 distinct groups with visible genetic distance between them (Figure 5). These groups  
446 were distinct enough to assign a 4c lineage type to those samples with partial sequence  
447 only. After assigning lineages to all GI.4c-recombinants, we explored the interactions  
448 between the different lineages by mapping their sampling locations over time. We found  
449 that four of the five lineages were already circulating in 2017 (Figure 5). Lineage ii was  
450 not detected after 2017 while the other four lineages continued to be detected  
451 throughout 2018, 2019, and 2020. In VIC, where all lineages are circulating, there was  
452 no clear indication of geographical clustering of the different lineages. In TAS, lineages  
453 ii, iii, and iv were detected sporadically while lineage v has remained dominant over  
454 time, suggestive of a founder effect in this region. Similarly, in NSW/ACT lineage iv has  
455 remained dominant, also suggesting a regional founder effect, while lineages i, ii, and iii  
456 were only detected intermittently.

457

458

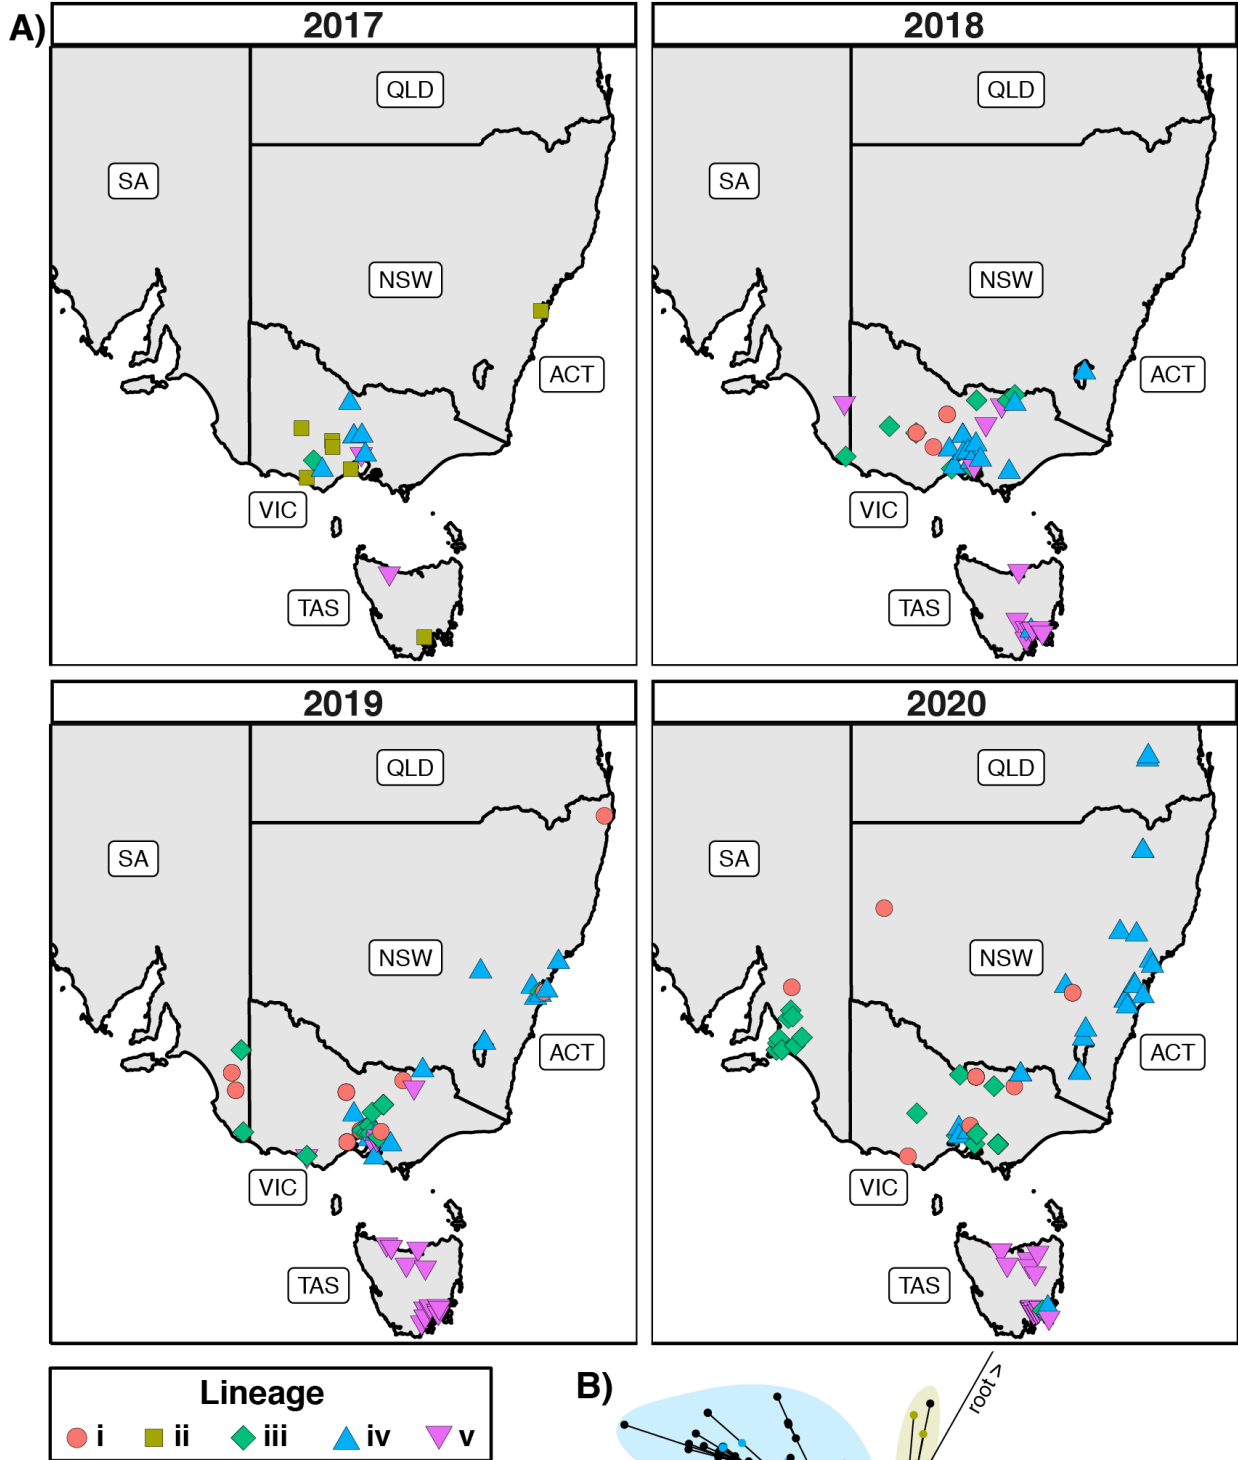

459 **Figure 5: Geographical distribution of 4c-recombinant lagoviruses in Australia,**  
460 **2017 to 2020.** (A) Sampling locations for the 4c lineages were mapped for each year  
461 following the emergence of this variant in 2017. (B) 4c-recombinant viruses were  
462 allocated to a 4c lineage based on ML phylogenetic grouping of the partial RdRp-VP60  
463 sequence (504 nt) with reference sequences. Reference sequences were annotated  
464 based on full genome sequencing and are indicated in the tree by the coloured tip  
465 points. The phylogeny was midpoint rooted and the scale bar represents nucleotide  
466 substitutions per site.

467

468 *The emergence of 4c-recombinant variants was not associated with antigenic changes*  
469 *in the VP60 capsid protein*

470 To determine whether the observed epidemiological replacement of 1) the parental  
471 RHDV2 virus by the novel 4c-recombinant in VIC and TAS, and 2) the 4e-recombinant  
472 in NSW/ACT were associated with nonsynonymous, potentially antigenic, changes in  
473 the VP60 capsid protein we performed ancestral state reconstruction using our prior  
474 Australian GI.2 VP60 phylogeny. Notably, four of the five 4c-recombinant lineages  
475 showed no amino acid changes in the capsid protein relative to the inferred ancestral  
476 RHDV2 node, suggesting that the emergence of these lineages was not associated with  
477 changes in antigenicity (Figure 3A). However, nonsynonymous mutations were  
478 identified in 4c-recombinant lineage i and in 4e-recombinant viruses (Figure 3A). When  
479 we mapped these mutations back to an atomic model of lagovirus GI VP60, both  
480 mutations were within the protruding domain, specifically the P2 subdomain, which is  
481 known to contain immunodominant epitopes (Figure 3B) [61]. The 4c-recombinant  
482 lineage i was associated with an S364G mutation, while an I434T mutation was present  
483 in all lineage 4e-recombinants (Figure 3A). Thus, it is possible that the epidemiological  
484 fitness of the 4e-recombinant variant in NSW/ACT may be attributable to antigenic  
485 changes in the capsid; however, this cannot explain the replacement of parental RHDV2  
486 by 4c-recombinant variants in VIC or TAS, or the continued co-circulation of 4c-  
487 recombinant lineages without changes in VP60. Furthermore, in NSW/ACT the 4e-

488 recombinant variant, despite the I434T change in VP60, appears to be currently  
489 undergoing replacement by the 4c-recombinant.

490

## 491 **Discussion**

492 In a global landscape where population immunity to GI.1 and GI.1a viruses was  
493 widespread in lagomorphs, it is unsurprising that GI.2 viruses were so successful and  
494 rapidly replaced GI.1 strains. We were interested to determine whether, after  
495 establishment, GI.2 viruses would continue to evolve via immune selection and  
496 antigenic drift or by other mechanisms. We were also interested to document whether  
497 variants without the GI.2 capsid would emerge as population immunity increased  
498 against this genotype. Instead, we found that the GI.2 capsid was retained and that the  
499 emerging recombinant variants acquired alternative NS genes. It is becoming  
500 increasingly clear that recombination is a major driver of calicivirus diversity, facilitating  
501 the emergence of new variants including those with pandemic and panzootic potential  
502 [24, 25, 62, 63]. However, the frequency at which viable recombination occurs and the  
503 genetic drivers of epidemiological fitness are still poorly understood. In this study, a  
504 continent-scale natural competition experiment of lagoviruses in Australia, we found that  
505 viable recombination occurs at an extremely high frequency given the right agent, host,  
506 and environmental circumstances.

### 507 *Six viable recombination events in Australian lagoviruses between 2014 and 2018*

508 Shortly after detecting two exotic lagovirus incursions in Australia, RHDVa-Aus (GI.4eP-  
509 GI.1a) in 2014 and RHDV2 (GI.1bP-GI.2) in 2015 [32, 37], we reported the emergence  
510 of a recombinant variant of these two viruses (4e-recombinant; GI.4eP-GI.2), detected  
511 in July 2016 in NSW [31]. This finding prompted the development of improved molecular  
512 tests for the detection of recombination and the subsequent retrospective and  
513 prospective screening of lagovirus-positive samples for further recombination events.  
514 This screen identified an additional novel recombinant lagovirus, a GI.4cP-GI.2 variant  
515 (4c-recombinant), first detected in VIC in February 2017. Further analysis determined  
516 that the VP60 genes of this 4c-recombinant separated into five distinct clades (Figure

517 3A), suggesting that this variant emerged on five separate occasions following at least  
518 five independent recombination events. Recombination was already known to occur in  
519 lagoviruses. For example, in the last decade, the lagovirus GI.2 capsid has been  
520 detected in combination with five different sets of NS genes [24, 27, 31, 33]. Our study  
521 demonstrates that viable recombination during natural infection occurs even more  
522 frequently than previously appreciated but may often go undetected if different events  
523 result in closely related progeny. Since the first detection of RHDV2 in Australia in mid-  
524 2015 [37] this capsid gene has recombined and produced epidemiologically viable  
525 variants at least six times in a two-year period.

526 The previously reported 4e-recombinant arose from a recombination event between  
527 RHDVa-Aus (GI.1aP-GI.2) and RHDV2 (GI.1bP-GI.2), both recombinant viruses  
528 themselves that were exotic incursions detected in Australia in January 2014 and May  
529 2015, respectively, although the source of these viruses remains unknown [31, 32, 37].  
530 Detections of the parental RHDVa-Aus were predominantly restricted to the Sydney  
531 basin region of NSW, with two cases detected in QLD and one further case in a wild  
532 rabbit in the ACT [32]. Therefore, it is not surprising that the 4e-recombinant emerged in  
533 NSW/ACT, according to our epidemiological data and phylogeographic analysis (Figure  
534 4). The 4c-recombinants arose from recombination events between RHDV2 (GI.1bP-  
535 GI.1) and endemic RCV-A1 (GI.4c) viruses [14, 37]. Emergence of the 4c-recombinant  
536 variants in the south-eastern states of Australia is consistent with high rabbit population  
537 densities and a high seroprevalence to GI.4 viruses in these regions compared to more  
538 arid regions of Australia [64].

539 Despite the VP60 phylogeny suggesting multiple recombination events between GI.4c  
540 and GI.2 viruses, only a single unique recombination event was detected by the RDP4  
541 program. This is not surprising given that the breakpoint locations are indistinguishable  
542 and these recombinants (and their true parents) are very closely related. Indeed, it was  
543 only possible to infer the true number of recombination events because of the high  
544 sampling frequency of parental RHDV2 viruses, which has been maintained for this and  
545 previous studies. Had RHDV2 sequences from intervening clades not been sampled,  
546 the 4c-recombinants would have formed a monophyletic clade and a single



547 recombination event assumed. This is demonstrated by the NS genes phylogeny  
548 (Figure 4A), in which the 4c-recombinant sequences form a single clade within the  
549 greater GI.4c clade. Importantly, within this clade the sequences group into the same  
550 five lineages as seen in the VP60 tree. Compared to pathogenic GI.2 viruses, benign  
551 RCV-A1 (GI.4c) viruses are greatly under-sampled in Australia, with the most recent  
552 RCV-A1 sequences (n = 6) derived from samples collected from the ACT in 2012 and  
553 2014 [35]. Aside from three sequences sampled in 2014, no other RCV-A1 sequences  
554 were available for the entirety of the study period. Consequently, a close relative of the  
555 RCV-A1 parental virus has not been sequenced, suggesting a hidden diversity of  
556 unsampled RCV-A1 viruses in Australian rabbits. This study provides a lower bound to  
557 the rate of recombination in these viruses; it is possible that additional recombination  
558 events have occurred with GI.4c viruses that are not observable against the current  
559 background of available GI.2 VP60 sequences.

560 *Lagoviruses show frequent recombination between the GI.2 capsid and GI.4 NS*  
561 *sequences*

562 Interestingly, all the recombination events detected during the study period involved the  
563 pairing of a GI.2 capsid and the NS genes of a GI.4 virus. Despite screening over 800  
564 lagovirus-positive samples, we found no evidence for recombinant variants with either  
565 capsid or NS sequences of GI.1 viruses.

566 For recombination to occur several criteria must be met [23]. Firstly, there must be  
567 coinfection of an individual host. This is influenced by host tropism, the prevalence of  
568 each parental virus in the population, and the duration of infection. Secondly, there must  
569 be coinfection of a single cell, both viruses must replicate within this cell, and precise  
570 template switching must occur to generate viable gRNA. Finally, the resultant variant  
571 must be epidemiologically competitive. That is, it must be able to successfully transmit,  
572 to establish infection in new hosts, and to avoid being outcompeted by either the  
573 parental or other circulating variants.

574 Following the epizootic incursion of an antigenically novel virus, RHDV2, into a naïve  
575 population, the prevalence of this variant was extremely high in Australian rabbits,  
576 reflected by the estimated population-wide mortality rate of 60% following the arrival of

577 RHDV2 [39]. The detection of four GI.1 and GI.2 co-infections in this study between  
578 2015 and 2017 demonstrates that both viruses were circulating at sufficiently high  
579 prevalence for mixed infections to occur. However, this doesn't explain the predilection  
580 for GI.4 (RCV) NS sequences. The discovery of 4c-recombinants was surprising, since  
581 the parental RCV-A1 is a benign enterotropic lagovirus [14], while RHDV2 (and RHDV1)  
582 viruses are virulent and hepatotropic. This would seem to preclude coinfection of  
583 individual cells with both viruses. Yet, several recombinants of RHDV2 and benign  
584 enterotropic RCVs have also been reported from Europe [64]. This suggests that active  
585 replication of both RCVs and RHDV2 must be occurring in the same target cell.  
586 Extrapolating from our current understanding of human and murine norovirus tropism,  
587 macrophages or other immune cells may be likely candidates [65]. This is further  
588 supported by the detection of plus- and minus-strand viral RNAs in splenic and alveolar  
589 macrophages of rabbits experimentally infected with RHDV1 [66]. Additionally, RCVs  
590 typically infect young rabbits early in life [12, 14]. Although young rabbits can be  
591 infected with RHDV1 viruses, robust innate immunity limits the extent of viral replication  
592 in an age-dependent manner [34, 39]. Thus, mixed infections with RHDV1 and RCVs  
593 are probably infrequent. This age-dependent resistance is not observed with RHDV2  
594 infection [67]. Furthermore, the duration of infection is longer for benign RCVs  
595 compared to pathogenic variants, where infected individuals typically die within 48 – 72  
596 hours post-infection [2]. These factors may at least partly explain why RCV-RHDV2  
597 recombinants appear to emerge more frequently than RHDV1-RHDV2 recombinants.

#### 598 *Epidemiological drivers of lagovirus emergence and spread*

599 Both the 4e-recombinant and 4c-recombinant rapidly replaced the dominant circulating  
600 parental RHDV2 in NSW/ACT and VIC/TAS, respectively. This replacement, at least for  
601 several 4c-recombinant lineages, occurred without any associated antigenic changes in  
602 the capsid protein, demonstrating that the replacement was not driven by antigenic  
603 escape. This shows that NS sequence variation is an important driver of epidemiological  
604 fitness in lagoviruses, complementing similar findings in human and murine noroviruses  
605 [68, 69]. For example, the pandemic GII.P16/GII.4 Sydney 2012 norovirus, which does  
606 not contain unique substitutions in the capsid, has substitutions within the RdRp that are

607 proposed to increase transmissibility [69]. Infection with this variant also resulted in  
608 increased viral shedding compared to other norovirus genotypes, as measured by  
609 higher faecal viral loads [70]. Previous studies have shown that RdRp fidelity and intra-  
610 host viral diversity affect transmissibility of murine norovirus *in vivo*, with high-fidelity  
611 variants being less efficiently transmitted than the wild-type variant [71]. Taken together,  
612 these studies demonstrate that NS proteins, particularly the RdRp, are important drivers  
613 of calicivirus fitness. Interestingly, the *in vitro* polymerase replication activity of the  
614 cloned GI.4c RdRp was previously shown to be at least two times that of the RHDV1  
615 (GI.1c) RdRp [72], although comparison to the GI.1b RdRp, the specific ‘competing’  
616 variant in the current study, was not reported. Analogous to the findings in murine  
617 norovirus, we propose that a higher replication rate of GI.4 RdRps may lead to  
618 increased intra-host viral diversity and transmissibility of GI.4 recombinants. However,  
619 we cannot rule out that other NS proteins may also contribute to the observed high  
620 fitness of the recombinant variants.

621 Within the 4c-recombinants, there was no evidence of dominance of any one lineage  
622 over time. The apparent dominance of lineage iv in NSW/ACT and lineage v in TAS is  
623 consistent with founder effects in both of those states. This demonstrates that different  
624 lagoviruses can cocirculate at relative equilibrium over extended periods of time. This  
625 further supports that the observed rapid replacement of parental RHDV2 (GI.1bP-GI.2)  
626 by GI.4P recombinant variants in this study is due to a fitness advantage of these  
627 variants, conferred by the NS proteins and possibly associated with the RdRp.

#### 628 *The lagovirus capsid governs host and tissue tropism and is correlated with virulence*

629 Both the newly identified 4c-recombinant and the previously emerged 4e-recombinant  
630 are virulent, hepatotropic viruses that were recovered from the livers of both rabbits and  
631 hares and from rabbits of all ages in this study. This tropism mimics that seen with other  
632 GI.2 viruses [73-80]. In stark contrast, the parental RCV-A1 is a benign, enterotropic  
633 virus that has only been recovered from rabbits [14], while the RHDVa-Aus variant,  
634 although virulent and hepatotropic, has only been found in adult rabbits. Our findings  
635 suggest that it is the lagovirus capsid that confers both host and tissue tropism and that  
636 tissue tropism is correlated with virulence.

637 With the broader host tropism conferred by the GI.2 capsid, there is increased potential  
638 for the emergence of novel epizootic lagovirus variants through both intragenotypic and  
639 intergenotypic recombination. Hares are known to carry their own, presumed benign,  
640 caliciviruses [16-18, 31, 33, 73-79]. Indeed, the first intergenotypic lagovirus  
641 recombinants were recently reported from Germany [33]. Since the incursion of RHDV2  
642 into North America in 2020 this variant has also been reported to infect several  
643 *Sylvilagus* species (cottontail rabbits) [81]. Although endemic *Sylvilagus* caliciviruses  
644 have never been reported, very limited sampling has been conducted in this species. It  
645 remains to be seen whether North American leporids may be a new reservoir for the  
646 emergence of novel lagoviruses with panzootic potential. This highlights the need for  
647 ongoing surveillance and full genetic characterization of lagoviruses and other  
648 caliciviruses to facilitate detection of future emerging variants of significance to both  
649 animal and human health.

650

## 651 **Acknowledgements**

652 We wish to thank all submitters, including domestic pet owners, landholders, and  
653 veterinarians, for assistance with sample collection. We thank members of the previous  
654 RHD-Boost program of the Invasive Animals Cooperative Research Centre that  
655 established the National Rabbit Monitoring Program. We thank Tiffany O'Connor and  
656 the virology team at Elizabeth Macarthur Agricultural Institute for contributing additional  
657 positive samples. We thank Peter West, Emma Sawyers, and the RabbitScan team for  
658 the development and ongoing support of this mobile and web app through which we  
659 receive rabbit samples. We thank Roslyn Mourant, Melissa Piper, Dimple Bhatia, and  
660 Lily Tran for assistance with sample processing. We would also like to thank Carlo  
661 Pacioni for his advice on analyses, and Alex Gofton and Matthew Neave for critical  
662 appraisal of the manuscript. Finally, the authors acknowledge the Sydney Informatics  
663 Hub and the University of Sydney's high-performance computing cluster Artemis for  
664 providing the high-performance computing resources that contributed to the research  
665 results reported within this paper.

666

## 667 **Funding**

668 This work was supported by the Centre for Invasive Species Solutions [P01-B-002 to  
669 T.S.]; and Australian Research Council Australian Laureate Fellowship [FL170100022  
670 to E.C.H].

671

## 672 **Data availability**

673 Full genome sequences are available in GenBank under accession numbers  
674 MW460205 – MW460242. All sequence alignments, tree files, and BEAST xml files are  
675 available at <https://doi.org/10.25919/758f-4t15>.

676

## 677 **References**

- 678 1. Parra, G.I., et al., *Static and Evolving Norovirus Genotypes: Implications for Epidemiology and*  
679 *Immunity*. PLoS Pathog, 2017. **13**(1): p. e1006136.
- 680 2. Abrantes, J., et al., *Rabbit haemorrhagic disease (RHD) and rabbit haemorrhagic disease virus*  
681 *(RHDV): a review*. Vet Res, 2012. **43**: p. 12.
- 682 3. Le Pendu, J., et al., *Proposal for a unified classification system and nomenclature of lagoviruses*. J  
683 Gen Virol, 2017. **98**(7): p. 1658-1666.
- 684 4. Gavier-Widen, D. and T. Morner, *Epidemiology and diagnosis of the European brown hare*  
685 *syndrome in Scandinavian countries: a review*. Rev Sci Tech, 1991. **10**(2): p. 453-8.
- 686 5. Liu, S.J., et al., *A new viral disease in rabbits*. J Vet Diagn Invest, 1984. **16**: p. 253-255.
- 687 6. Capucci, L., et al., *A further step in the evolution of rabbit hemorrhagic disease virus: the*  
688 *appearance of the first consistent antigenic variant*. Virus Res, 1998. **58**(1-2): p. 115-26.
- 689 7. Le Gall-Recule, G., et al., *Emergence of a new lagovirus related to Rabbit Haemorrhagic Disease*  
690 *Virus*. Vet Res, 2013. **44**: p. 81.
- 691 8. Le Gall-Recule, G., et al., *Detection of a new variant of rabbit haemorrhagic disease virus in*  
692 *France*. Vet Rec, 2011. **168**(5): p. 137-8.
- 693 9. Dalton, K.P., et al., *Variant rabbit hemorrhagic disease virus in young rabbits, Spain*. Emerg Infect  
694 Dis, 2012. **18**(12): p. 2009-12.

- 695 10. Capucci, L., et al., *Detection and preliminary characterization of a new rabbit calicivirus related*  
696 *to rabbit hemorrhagic disease virus but nonpathogenic*. J Virol, 1996. **70**(12): p. 8614-23.
- 697 11. Lemaitre, E., et al., *First complete genome sequence of a European non-pathogenic rabbit*  
698 *calicivirus (lagovirus Gl.3)*. Arch Virol, 2018. **163**(10): p. 2921-2924.
- 699 12. Capucci, L., A. Nardin, and A. Lavazza, *Seroconversion in an industrial unit of rabbits infected*  
700 *with a non-pathogenic rabbit haemorrhagic disease-like virus*. Vet Rec, 1997. **140**(25): p. 647-50.
- 701 13. Le Gall-Recule, G., et al., *Characterisation of a non-pathogenic and non-protective infectious*  
702 *rabbit lagovirus related to RHDV*. Virology, 2011. **410**(2): p. 395-402.
- 703 14. Strive, T., J.D. Wright, and A.J. Robinson, *Identification and partial characterisation of a new*  
704 *Lagovirus in Australian wild rabbits*. Virology, 2009. **384**(1): p. 97-105.
- 705 15. Nicholson, L.J., et al., *Benign Rabbit Calicivirus in New Zealand*. Appl Environ Microbiol, 2017.  
706 **83**(11).
- 707 16. Cavadini, P., et al., *Widespread occurrence of the non-pathogenic hare calicivirus (HaCV*  
708 *Lagovirus GII.2) in captive-reared and free-living wild hares in Europe*. Transbound Emerg Dis,  
709 2020.
- 710 17. Droillard, C., et al., *First complete genome sequence of a hare calicivirus strain isolated from*  
711 *Lepus europaeus*. Microbiol Resour Announc, 2018. **7**(22).
- 712 18. Droillard, C., et al., *Genetic diversity and evolution of Hare Calicivirus (HaCV), a recently*  
713 *identified lagovirus from Lepus europaeus*. Infect Genet Evol, 2020. **82**: p. 104310.
- 714 19. Mahar, J.E., et al., *The discovery of three new hare lagoviruses reveals unexplored viral diversity*  
715 *in this genus*. Virus Evol, 2019. **5**(1): p. vez005.
- 716 20. Ohlinger, V.F., et al., *Identification and characterization of the virus causing rabbit hemorrhagic*  
717 *disease*. J Virol, 1990. **64**(7): p. 3331-6.
- 718 21. Conley, M.J., et al., *Calicivirus VP2 forms a portal-like assembly following receptor engagement*.  
719 Nature, 2019. **565**(7739): p. 377-381.
- 720 22. Meyers, G., C. Wirblich, and H.J. Thiel, *Genomic and subgenomic RNAs of rabbit hemorrhagic*  
721 *disease virus are both protein-linked and packaged into particles*. Virology, 1991. **184**(2): p. 677-  
722 86.
- 723 23. Worobey, M. and E.C. Holmes, *Evolutionary aspects of recombination in RNA viruses*. J Gen Virol,  
724 1999. **80** ( Pt 10): p. 2535-2543.
- 725 24. Abrantes, J., et al., *Recombination at the emergence of the pathogenic rabbit haemorrhagic*  
726 *disease virus Lagovirus europaeus/GI.2*. Sci Rep, 2020. **10**(1): p. 14502.

- 727 25. Ludwig-Begall, L.F., A. Mauroy, and E. Thiry, *Norovirus recombinants: recurrent in the field,*  
728 *recalcitrant in the lab - a scoping review of recombination and recombinant types of noroviruses.*  
729 *J Gen Virol*, 2018. **99**(8): p. 970-988.
- 730 26. Bull, R.A., et al., *Norovirus recombination in ORF1/ORF2 overlap.* *Emerg Infect Dis*, 2005. **11**(7):  
731 p. 1079-85.
- 732 27. Lopes, A.M., et al., *Full genomic analysis of new variant rabbit hemorrhagic disease virus*  
733 *revealed multiple recombination events.* *J Gen Virol*, 2015. **96**(Pt 6): p. 1309-1319.
- 734 28. Lopes, A.M., et al., *GI.1b/GI.1b/GI.2 recombinant rabbit hemorrhagic disease virus 2 (Lagovirus*  
735 *europaeus/GI.2) in Morocco, Africa.* *Arch Virol*, 2019. **164**(1): p. 279-283.
- 736 29. Silverio, D., et al., *Insights into the evolution of the new variant rabbit haemorrhagic disease*  
737 *virus (GI.2) and the identification of novel recombinant strains.* *Transbound Emerg Dis*, 2018.  
738 **65**(4): p. 983-992.
- 739 30. Dalton, K.P., et al., *Conventional and real time RT-PCR assays for the detection and*  
740 *differentiation of variant rabbit hemorrhagic disease virus (RHDVb) and its recombinants.* *J Virol*  
741 *Methods*, 2018. **251**: p. 118-122.
- 742 31. Hall, R.N., et al., *A strain-specific multiplex RT-PCR for Australian rabbit haemorrhagic disease*  
743 *viruses uncovers a new recombinant virus variant in rabbits and hares.* *Transbound Emerg Dis*,  
744 2018. **65**(2): p. e444-e456.
- 745 32. Mahar, J.E., et al., *Detection and Circulation of a Novel Rabbit Hemorrhagic Disease Virus in*  
746 *Australia.* *Emerg Infect Dis*, 2018. **24**(1): p. 22-31.
- 747 33. Szillat, K.P., et al., *Full-genome sequencing of German rabbit haemorrhagic disease virus*  
748 *uncovers recombination between RHDV (GI.2) and EBHSV (GII.1).* *Virus Evolution*, 2020. **6**(2).
- 749 34. Mahar, J.E., et al., *Rabbit Hemorrhagic Disease Virus 2 (RHDV2; GI.2) Is Replacing Endemic*  
750 *Strains of RHDV in the Australian Landscape within 18 Months of Its Arrival.* *J Virol*, 2018. **92**(2).
- 751 35. Mahar, J.E., et al., *Benign Rabbit Caliciviruses Exhibit Evolutionary Dynamics Similar to Those of*  
752 *Their Virulent Relatives.* *J Virol*, 2016. **90**(20): p. 9317-29.
- 753 36. Kerr, P.J., R.N. Hall, and T. Strive, *Viruses for landscape-scale therapy: Biological control of*  
754 *rabbits in Australia.* *Methods Mol Biol*, 2021. **2225**: p. 1-23.
- 755 37. Hall, R.N., et al., *Emerging Rabbit Hemorrhagic Disease Virus 2 (RHDVb), Australia.* *Emerg Infect*  
756 *Dis*, 2015. **21**(12): p. 2276-8.
- 757 38. Kirkland, P.D. and M.J. Frost, *The impact of viral transport media on PCR assay results for the*  
758 *detection of nucleic acid from SARS-CoV-2.* *Pathology*, 2020. **52**(7): p. 811-814.

- 759 39. Ramsey, D.S.L., et al., *Emerging RHDV2 suppresses the impact of endemic and novel strains of*  
760 *RHDV on wild rabbit populations*. *Journal of Applied Ecology*, 2020. **57**(3): p. 630-641.
- 761 40. Eden, J.S., et al., *Comparative Phylodynamics of Rabbit Hemorrhagic Disease Virus in Australia*  
762 *and New Zealand*. *J Virol*, 2015. **89**(18): p. 9548-58.
- 763 41. Katoh, K. and D.M. Standley, *MAFFT multiple sequence alignment software version 7:*  
764 *improvements in performance and usability*. *Mol Biol Evol*, 2013. **30**(4): p. 772-80.
- 765 42. Minh, B.Q., et al., *IQ-TREE 2: New Models and Efficient Methods for Phylogenetic Inference in the*  
766 *Genomic Era*. *Mol Biol Evol*, 2020. **37**(5): p. 1530-1534.
- 767 43. Guindon, S., et al., *New algorithms and methods to estimate maximum-likelihood phylogenies:*  
768 *assessing the performance of PhyML 3.0*. *Syst Biol*, 2010. **59**(3): p. 307-21.
- 769 44. Martin, D.P., et al., *RD4: Detection and analysis of recombination patterns in virus genomes*.  
770 *Virus Evol*, 2015. **1**(1): p. vev003.
- 771 45. Yang, Z., *PAML 4: phylogenetic analysis by maximum likelihood*. *Mol Biol Evol*, 2007. **24**(8): p.  
772 1586-91.
- 773 46. Rambaut, A., et al., *Exploring the temporal structure of heterochronous sequences using TempEst*  
774 *(formerly Path-O-Gen)*. *Virus Evol*, 2016. **2**(1): p. vew007.
- 775 47. Drummond, A.J. and A. Rambaut, *BEAST: Bayesian evolutionary analysis by sampling trees*. *BMC*  
776 *Evol Biol*, 2007. **7**: p. 214.
- 777 48. Zharkikh, A., *Estimation of evolutionary distances between nucleotide sequences*. *J Mol Evol*,  
778 1994. **39**(3): p. 315-29.
- 779 49. R Core Team, *R: A language and environment for statistical computing*. 2020, R Foundation for  
780 Statistical Computing: Vienna, Austria.
- 781 50. Yu, G., et al., *ggtree: an r package for visualization and annotation of phylogenetic trees with*  
782 *their covariates and other associated data*. *Methods in Ecology and Evolution*, 2017. **8**(1): p. 28-  
783 36.
- 784 51. Wang, L.G., et al., *Treeio: An R Package for Phylogenetic Tree Input and Output with Richly*  
785 *Annotated and Associated Data*. *Mol Biol Evol*, 2020. **37**(2): p. 599-603.
- 786 52. Wickham, H. and D. Seidel, *scales: Scale Functions for Visualization*. 2020, R package version  
787 1.1.1.
- 788 53. Wickham, H., et al., *Welcome to the Tidyverse*. *Journal of Open Source Software*, 2019. **4**(43): p.  
789 1686.



- 790 54. Paradis, E. and K. Schliep, *ape 5.0: an environment for modern phylogenetics and evolutionary*  
791 *analyses in R*. Bioinformatics, 2019. **35**(3): p. 526-528.
- 792 55. Revell, L.J., *phytools: an R package for phylogenetic comparative biology (and other things)*.  
793 *Methods in Ecology and Evolution*, 2012. **3**(2): p. 217-223.
- 794 56. Schliep, K.P., *phangorn: phylogenetic analysis in R*. Bioinformatics, 2011. **27**(4): p. 592-3.
- 795 57. Wilke, C., *cowplot: Streamlined Plot Theme and Plot Annotations for 'ggplot2'*. 2020.
- 796 58. Golemund, G. and H. Wickham, *Dates and times made easy with lubridate*. *Journal of Statistical*  
797 *Software*, 2011. **1**(3).
- 798 59. Wickham, H., *The split-apply-combine strategy for data analysis*. *Journal of Statistical Software*,  
799 **2011**. **1**(1).
- 800 60. Sumner, M., *ozmaps: Australia Maps*. 2020.
- 801 61. Wang, X., et al., *Atomic model of rabbit hemorrhagic disease virus by cryo-electron microscopy*  
802 *and crystallography*. *PLoS Pathog*, 2013. **9**(1): p. e1003132.
- 803 62. Parra, G.I., *Emergence of norovirus strains: A tale of two genes*. *Virus Evol*, 2019. **5**(2): p. vez048.
- 804 63. Eden, J.S., et al., *Recombination within the pandemic norovirus GII.4 lineage*. *J Virol*, 2013.  
805 **87**(11): p. 6270-82.
- 806 64. Liu, J., et al., *Distribution and prevalence of the Australian non-pathogenic rabbit calicivirus is*  
807 *correlated with rainfall and temperature*. *PLoS One*, 2014. **9**(12): p. e113976.
- 808 65. Wobus, C.E., et al., *Replication of Norovirus in cell culture reveals a tropism for dendritic cells and*  
809 *macrophages*. *PLoS Biol*, 2004. **2**(12): p. e432.
- 810 66. Kimura, T., et al., *Distribution of rabbit haemorrhagic disease virus RNA in experimentally*  
811 *infected rabbits*. *J Comp Pathol*, 2001. **124**(2-3): p. 134-41.
- 812 67. Neave, M.J., et al., *Robust Innate Immunity of Young Rabbits Mediates Resistance to Rabbit*  
813 *Hemorrhagic Disease Caused by Lagovirus Europaeus GI.1 But Not GI.2*. *Viruses*, 2018. **10**(9).
- 814 68. Tohma, K., et al., *Phylogenetic Analyses Suggest that Factors Other Than the Capsid Protein Play*  
815 *a Role in the Epidemic Potential of GII.2 Norovirus*. *mSphere*, 2017. **2**(3).
- 816 69. Ruis, C., et al., *The emerging GII.P16-GII.4 Sydney 2012 norovirus lineage is circulating*  
817 *worldwide, arose by late-2014 and contains polymerase changes that may increase virus*  
818 *transmission*. *PLoS One*, 2017. **12**(6): p. e0179572.
- 819 70. Cheung, S.K.C., et al., *Higher Viral Load of Emerging Norovirus GII.P16-GII.2 than Pandemic GII.4*  
820 *and Epidemic GII.17, Hong Kong, China*. *Emerg Infect Dis*, 2019. **25**(1): p. 119-122.

- 821 71. Arias, A., et al., *Norovirus Polymerase Fidelity Contributes to Viral Transmission In Vivo*.  
822 mSphere, 2016. **1**(5).
- 823 72. Urakova, N., et al., *Purification and Biochemical Characterisation of Rabbit Calicivirus RNA-*  
824 *Dependent RNA Polymerases and Identification of Non-Nucleoside Inhibitors*. *Viruses*, 2016. **8**(4):  
825 p. 100.
- 826 73. Puggioni, G., et al., *The new French 2010 Rabbit Hemorrhagic Disease Virus causes an RHD-like*  
827 *disease in the Sardinian Cape hare (*Lepus capensis mediterraneus*)*. *Vet Res*, 2013. **44**: p. 96.
- 828 74. Camarda, A., et al., *Detection of the new emerging rabbit haemorrhagic disease type 2 virus*  
829 *(RHDV2) in Sicily from rabbit (*Oryctolagus cuniculus*) and Italian hare (*Lepus corsicanus*)*. *Res Vet*  
830 *Sci*, 2014. **97**(3): p. 642-5.
- 831 75. Hall, R.N., et al., *Detection of RHDV2 in European brown hares (*Lepus europaeus*) in Australia*.  
832 *Vet Rec*, 2017. **180**(5): p. 121.
- 833 76. Velarde, R., et al., *Spillover Events of Infection of Brown Hares (*Lepus europaeus*) with Rabbit*  
834 *Haemorrhagic Disease Type 2 Virus (RHDV2) Caused Sporadic Cases of an European Brown Hare*  
835 *Syndrome-Like Disease in Italy and Spain*. *Transbound Emerg Dis*, 2017. **64**(6): p. 1750-1761.
- 836 77. Le Gall-Recule, G., et al., *Large-scale lagovirus disease outbreaks in European brown hares*  
837 *(*Lepus europaeus*) in France caused by RHDV2 strains spatially shared with rabbits (*Oryctolagus**  
838 *cuniculus)*. *Vet Res*, 2017. **48**(1): p. 70.
- 839 78. Neimanis, A.S., et al., *Overcoming species barriers: an outbreak of *Lagovirus europaeus**  
840 *GI.2/RHDV2 in an isolated population of mountain hares (*Lepus timidus*)*. *BMC Vet Res*, 2018.  
841 **14**(1): p. 367.
- 842 79. Buehler, M., et al., *Lagovirus europaeus GI.2 (rabbit hemorrhagic disease virus 2) infection in*  
843 *captive mountain hares (*Lepus timidus*) in Germany*. *BMC Vet Res*, 2020. **16**(1): p. 166.
- 844 80. Dalton, K.P., et al., *Spread of new variant RHDV in domestic rabbits on the Iberian Peninsula*. *Vet*  
845 *Microbiol*, 2014. **169**(1-2): p. 67-73.
- 846 81. Sleeman, J., *National Wildlife Health Center Wildlife Health Bulletin 2020-06*. 2020, USGS  
847 National Wildlife Health Center.

848
